# Supplementary material for: Facile synthesis and high formaldehyde-sensing performance of NiO–SnO2 hybrid nanospheres
Source: Royal Society of Chemistry journal article supplement (doi:10.1039/c5ra21063a), 2016-01-01
Supplement: c5ra21063a1.pdf [file c5ra21063a1.pdf]

Supporting Information  
for

## "Facile Synthesis and High Formaldehyde-sensing Performance of NiO-SnO<sub>2</sub> Hybrid Nanospheres"

Guochen Zhang,<sup>a</sup> Xue Han,<sup>a</sup> Weiwei Bian,<sup>b</sup> Jinhua Zhan,<sup>a</sup> and Xicheng Ma <sup>\*a</sup>

<sup>a</sup> School of Chemistry and Chemical Engineering, Shandong University, Jinan 250100, PR China

<sup>b</sup> Medical Chemistry Staff Room, Weifang Medical University, Weifang 261053, Shandong, PR  
China

Corresponding author. Tel: +86 531 88392430; fax: +86 531 88564464.

E-mail address: maxch@sdu.edu.cn

S1:

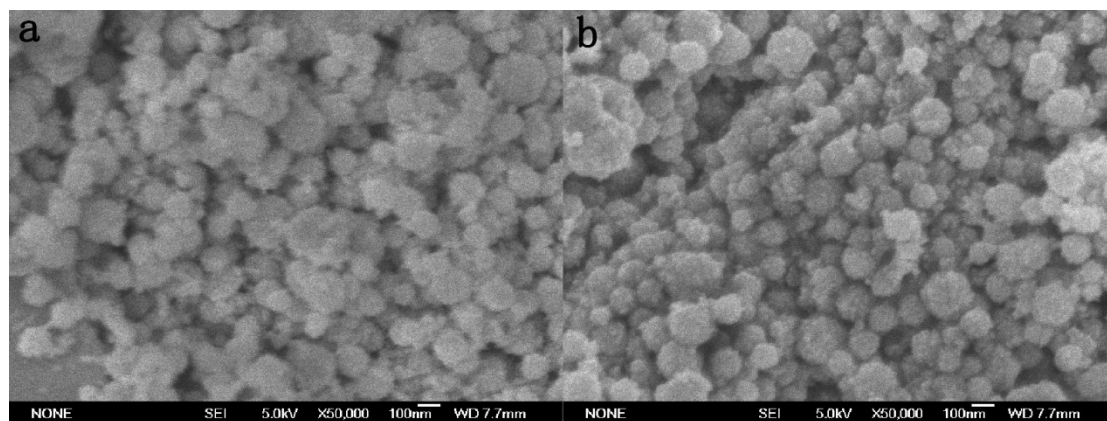

Fig.S1: (a) SEM image of pure porous SnO<sub>2</sub> nanospheres; (b) SEM image of NiO-doped SnO<sub>2</sub> nanospheres.

S2:

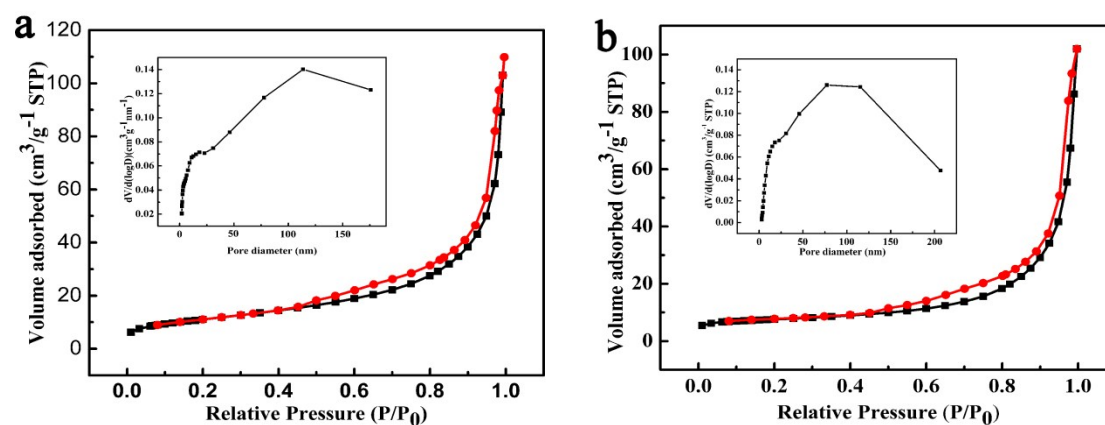

Fig.S2: Typical nitrogen adsorption–desorption isotherm and BJH pore size distribution plots (inset) of pure porous SnO<sub>2</sub> nanospheres (a) and NiO-doped SnO<sub>2</sub> nanospheres (b).

S3:

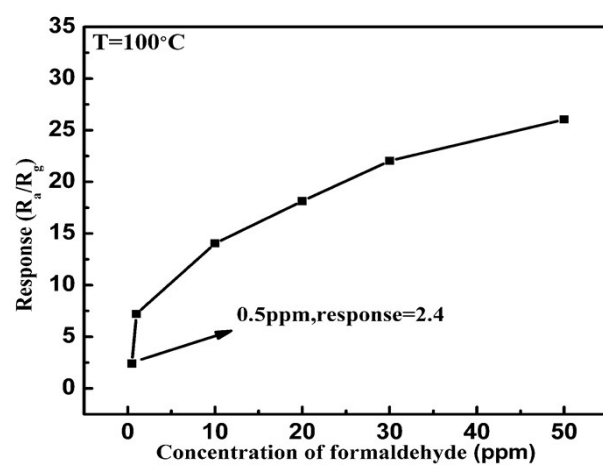

Fig.S3: The corresponding relationships between the response and the concentrations of formaldehyde at 100°C.

S4:

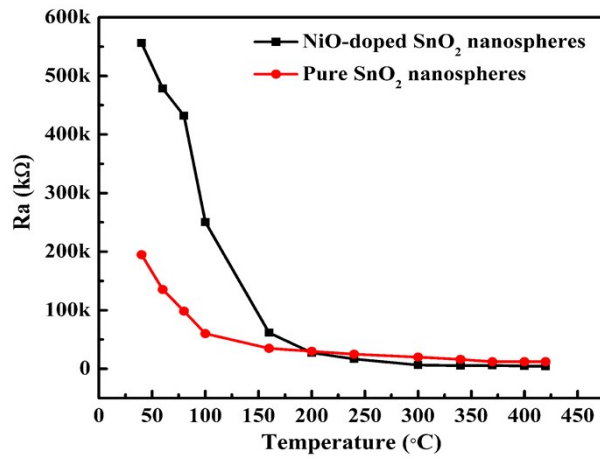

Fig.S4: The electrical resistance of pure porous SnO<sub>2</sub> nanospheres (red) and NiO-doped SnO<sub>2</sub> nanospheres (black) in air at different temperatures.
